# Supplementary material for: A Kinesin Vdkin2 Required for Vacuole Formation, Mycelium Growth, and Penetration Structure Formation of Verticillium dahliae
Source: MDPI journal article supplement (doi:10.3390/jof8040391), 2022-04-12
Supplement: s1 [file s1]

## Supplementary Materials

# A Kinesin Vdkin2 Required for Vacuole Formation, Mycelium Growth, and Penetration Structure Formation of *Verticillium dahliae*

Xing Yang <sup>1,2</sup>, Cuimei Guo <sup>1,2</sup>, Chi Chen <sup>1,2</sup>, Zhijuan Hu <sup>1,2</sup>, Xinyao Zheng <sup>1,2</sup>, Shan Xu <sup>1,2</sup>, Xingyong Yang <sup>3</sup> and Chengjian Xie <sup>1,2,\*</sup>

- <sup>1</sup> The Chongqing Key Laboratory of Molecular Biology of Plant Environmental Adaptations, Chongqing Normal University, Chongqing 401331, China; 2019110513033@stu.cqnu.edu.cn (X.Y.); 2019110513007@stu.cqnu.edu.cn (C.G.); 2020110513007@stu.cqnu.edu.cn (C.C.); 2021110513003@stu.cqnu.edu.cn (Z.H.); 2021210513054@stu.cqnu.edu.cn (X.Z.); 20200017@cqnu.edu.cn (S.X.)
- <sup>2</sup> Chongqing Engineering Research Center of Specialty Crop Resources, The College of Life Science, Chongqing Normal University, Chongqing 401331, China
- <sup>3</sup> College of Pharmacy, Chengdu University, Chengdu 610106, China; yangxingyong@cdu.edu.cn
- \* Correspondence: xcj614@163.com or 20131913@stu.cqnu.edu.cn; Tel.: +86-13594334787

## ASSOCIATED CONTENT

## Supplementary Figures and Tables

**Figure S1.** *VdKin2* knockout and complementation in *Verticillium dahliae*.**Figure S2.** The results of the pathogenic analysis.**Figure S3.** Number of conidia calculated in potato dextrose broth medium.**Figure S4.** Strains were cultured on solid microsclerotia-inducing medium to induce microsclerotial formation.**Figure S5.** Strains were cultured on solid microsclerotia-inducing medium with or without cellophane membrane.**Table S1.** Primers used in this study.**Table S2.** *Verticillium dahliae* strains used in this study.

## Supporting Information Methods

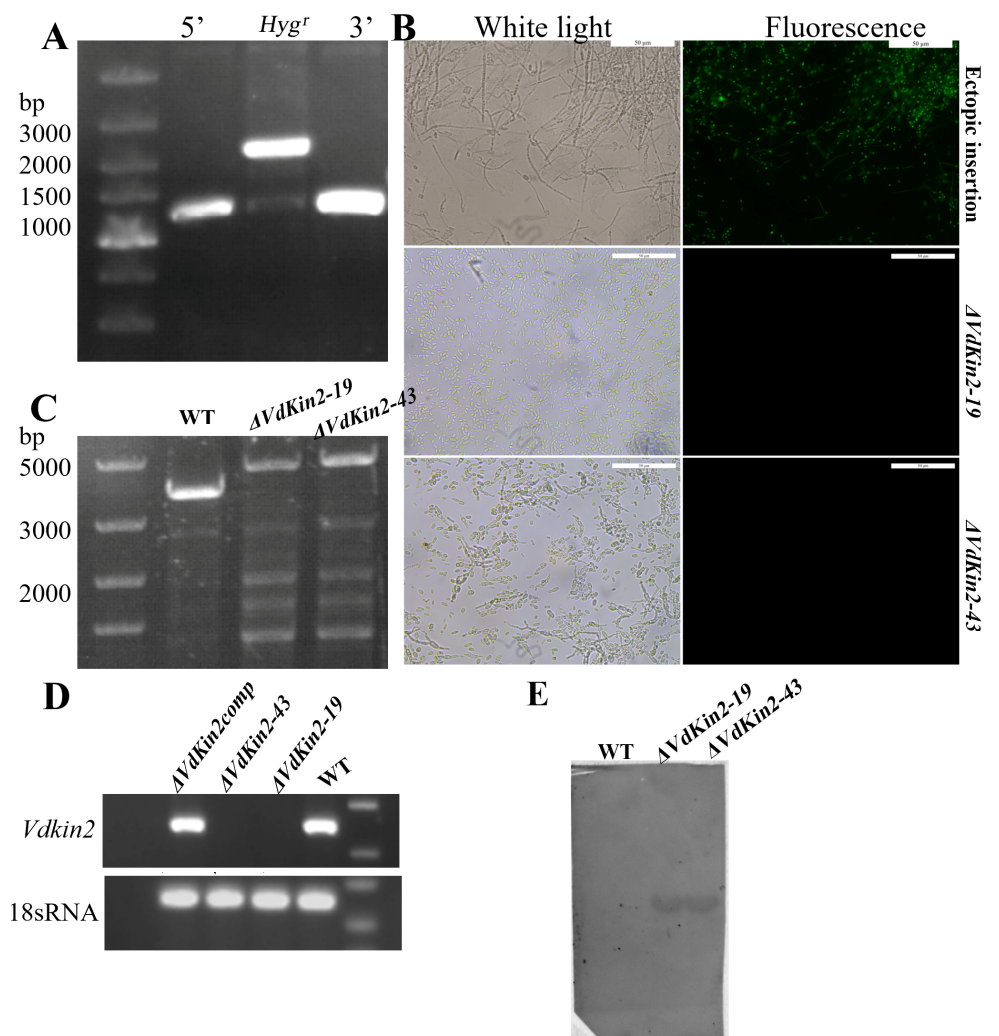

**Figure S1.** *VdKin2* knockout and complementation in *Verticillium dahliae*. (A) 5'- and 3'-flanking region of *VdKin2* and hygromycin resistance gene (*Hyg<sup>r</sup>*). (B) GFP was not observed in null mutants but was present in ectopic insertion transformants or null mutants with ectopic insertions. (C) Gene-deletion event was verified using a pair of primers complementary to the region outside of the two homologous arms of the *VdAA9*-deletion cassettes. (D) RT-PCR revealed the elimination of *Vdkin2* in gene-deletion mutants. 18S rRNA served as an internal control. (E) Southern blotting indicates a single-copy insertion of the *Hyg<sup>r</sup>* gene in *VdKin2* mutants.

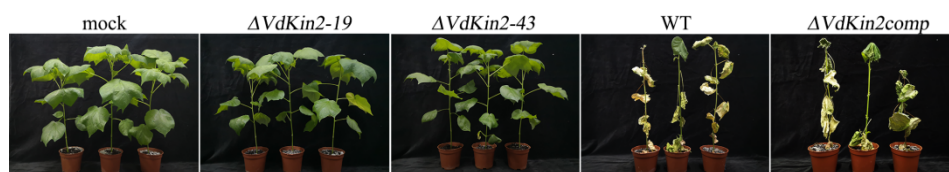

**Figure S2.** The results of the pathogenic analysis. Four-week-old cotton seedlings were inoculated with wild-type (WT),  $\Delta VdKin2-19$ ,  $\Delta VdKin2-43$ , or  $\Delta VdKin2comp$  or sterile water (mock) at  $10^7$  spores/mL and cultured in a greenhouse. Symptoms of *Verticillium* wilt were photographed at 40 days after inoculation.

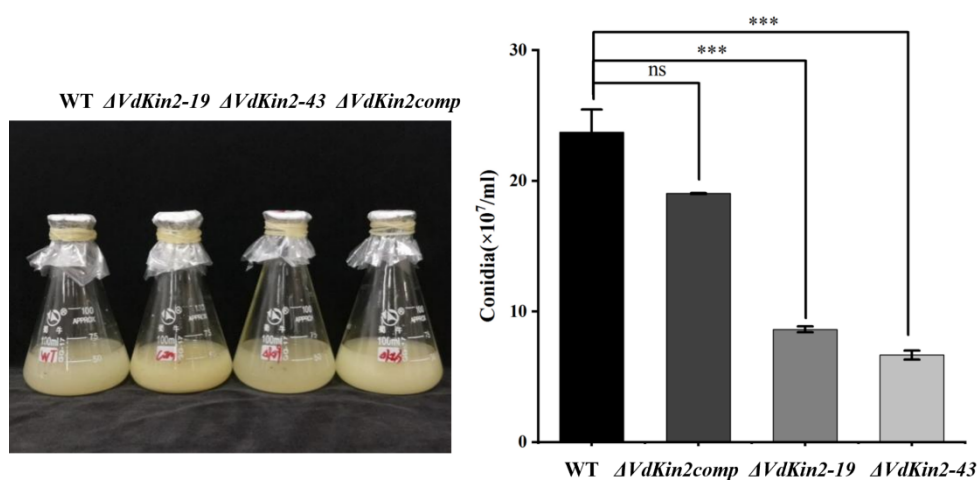

**Figure S3.** Number of conidia calculated in potato dextrose broth medium. Values are the means plus standard deviations (error bars) from three replicates. \*\*\*significant differences at  $P < 0.001$ , based on Student's *t*-test.

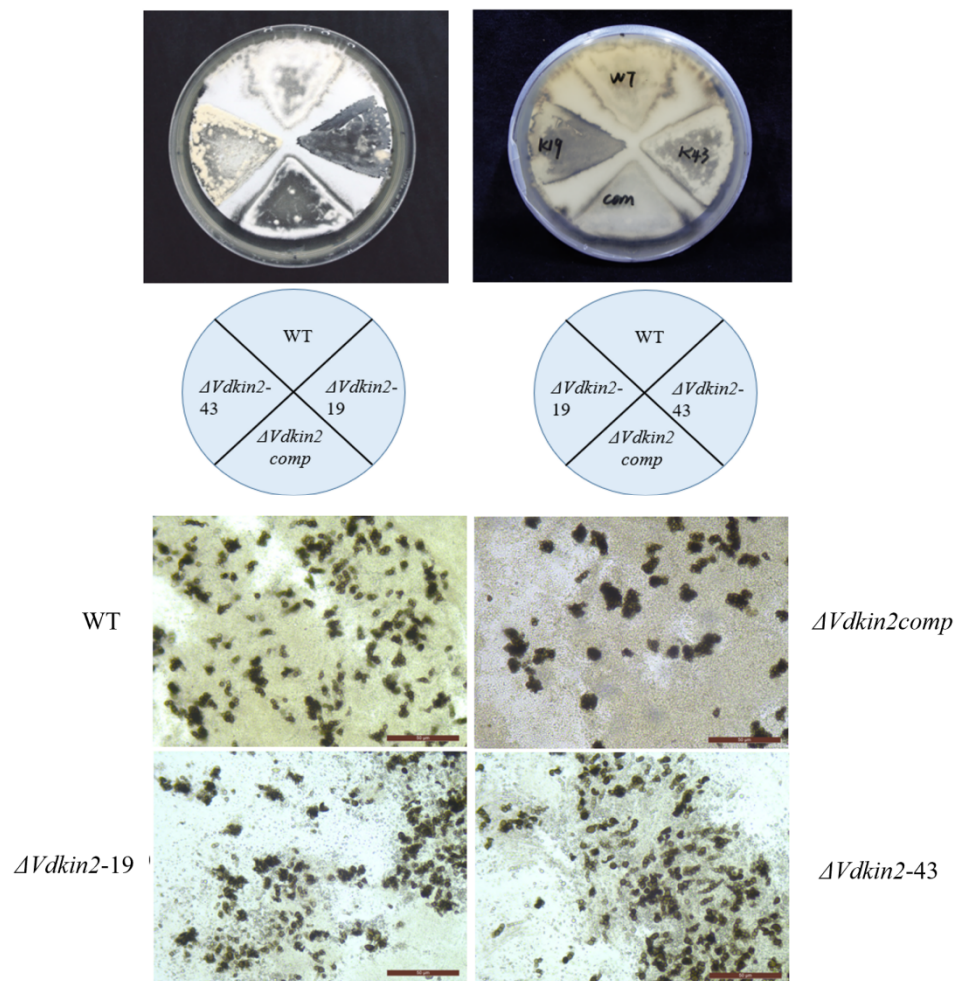

**Figure S4.** Strains were cultured on solid microscerotia-inducing medium to induce microscerotial formation. Mycelia and microscerotia were scraped off the membrane for examination and counting under a microscope. Photos of the same Petri dishes were taken at 15 days post inoculation.

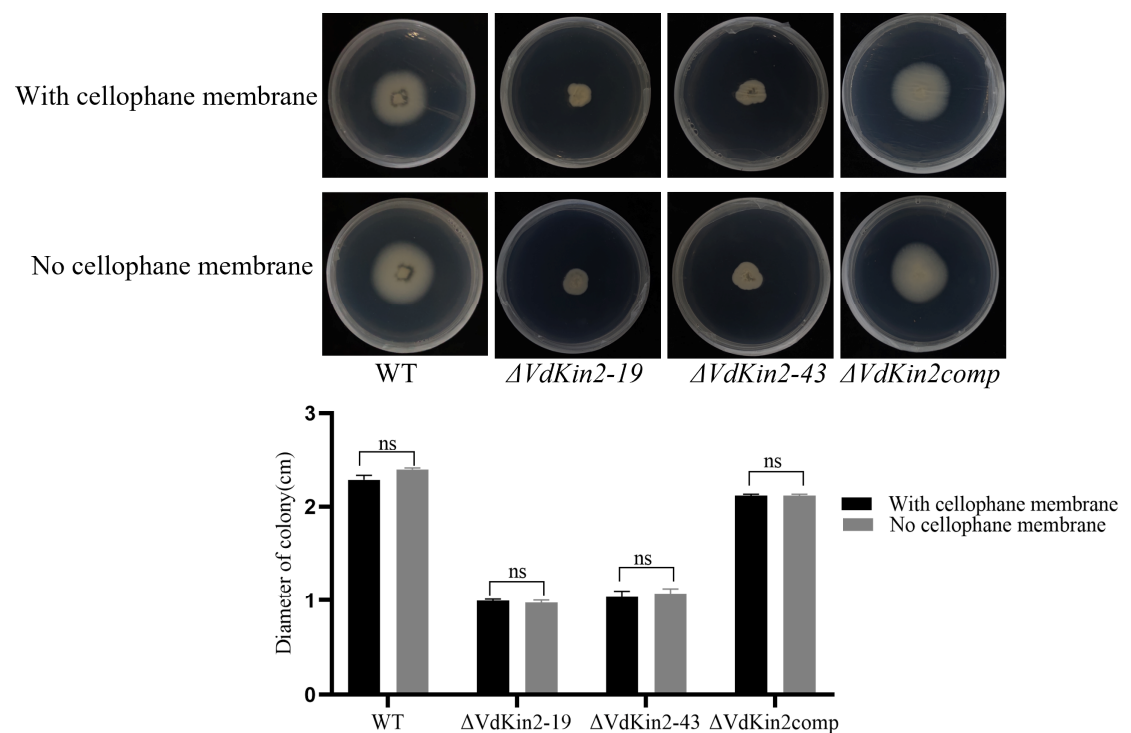

**Figure S5.** Strains were cultured on solid microsclerotia-inducing medium with or without cellophane membrane. The colonies were examined, and the diameter of each colony was measured at the 6th day.

**Table S1.** Primers used in this study.

| Primer name  | 5'-3'                                     | Use                           |
|--------------|-------------------------------------------|-------------------------------|
| 5F           | AGAAGAGTAATCTAGCAAACGTCGAAGCCTCGAAC       | Amplifying 5' homologous arms |
| 5R           | TTAGTGAGGGTTAATTGCGCGCGCTAGACATGATGACGAC  | Amplifying 5' homologous arms |
| 3F           | AGTTGTTCCCACTGATCTTCGTGGAAGGCGAGATTCAGATG | Amplifying 3' homologous arms |
| 3R           | ATTACGAATTGGATCACGCGCTCGCAGCGGTTCTG       | Amplifying 3' homologous arms |
| Hyg-F        | GCGCAATTAACCCTCACTAAA                     | Amplifying Hygr cassette      |
| Hyg-R        | CGAAGATCACTGGGAACAAC                      | Amplifying Hygr cassette      |
| 5OUT         | GACATACGACGTGGCAGCTG                      | Identify mutant               |
| 3OUT         | CTGCTGAGCCCCGGTTGTTCC                     | Identify mutant               |
| Vdkin2comp f | CGGCCAGTGCCAAGCTTCAGTACCCGATAACGTCATG     | Amplifying Vdkin2 complement  |
| Vdkin2comp r | CAGTTAACGTCGAATTCCTCGCTATTGCCGATGCTG      | Amplifying Vdkin2 complement  |
| 18sRNAf      | CCGCCGGTCCATCAGTCTCTCTGTTTATA             | Identify mutant               |
| 18sRNAr      | CGCCTGCGGGACTCCGATGCGAGCTGTAAC            | Identify mutant               |
| Probe F      | CCGCGCTCCCATTCCGGAAGTG                    | Southern blot probe           |
| Probe R      | GCTTCTGCGGGCGATTTGTGTAC                   | Southern blot probe           |
| Vdkin2 exf   | CGCCAACAGCATTAAGGTTG                      | Identify mutant               |
| Vdkin2 exr   | CTCGTCGTCGATGCTGGAAC                      | Identify mutant               |
| G418Sep5F    | CAATCTTCAAATCTAGAATGTCGTCTTCAGCTACTTT     | Expressing <i>Sep5</i>        |
| G418Sep5R    | CCACCGCCTCCACTAGTTTTGCTGTCATTCTCGCCGT     | Expressing <i>Sep5</i>        |
| GFPF         | TCTAGAGGATCCTTAATTAAATGGTGAGCAAGGGCGAGG   | Colonization                  |
| GFPR         | AGTTAACGTCGAATTCCTACTTGTACAGCTCGTCCATGCC  | Colonization                  |

Table S2. *Verticillium dahliae* strains used in this study.

| Strain                      | Genotype description                                  | Reference        |
|-----------------------------|-------------------------------------------------------|------------------|
| V991                        | Wild type                                             | Xie et al., 2017 |
| $\Delta Vdkin2$             | <i>Vdkin2</i> deletion mutant                         | This study       |
| <i>Vdkin2comp</i>           | <i>Vdkin2</i> complementary strain                    | This study       |
| WT/GFP                      | Transformant of V991 expressing <i>GFP</i>            | This study       |
| $\Delta Vdkin2$ /GFP        | Transformant of $\Delta Vdkin2$ expressing <i>GFP</i> | This study       |
| WT/VdSep5-GFP               | Transformant of V991 expressing VdSep5-GFP            | This study       |
| $\Delta VdKin2$ /VdSep5-GFP | Transformant of $\Delta Vdkin2$ expressing VdSep5-GFP | This study       |

### Supporting Information Methods

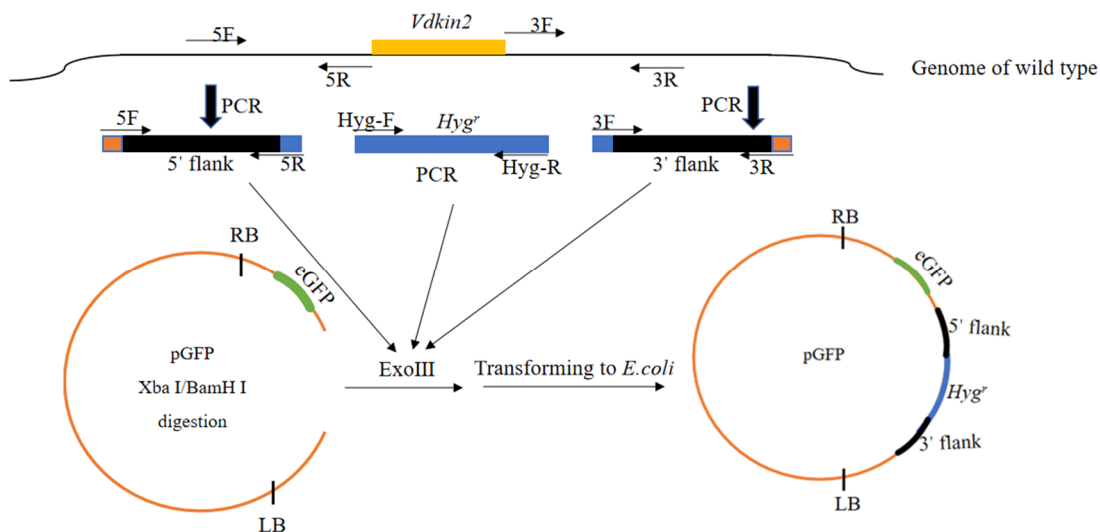

### Construction of gene knock-out vectors.

- 1, The 5' (5F/5R) and 3' (3F/3R) flanking sequence and *Hyg<sup>r</sup>* cassette (*Hyg-f*/*Hyg-r*) were amplified using high-fidelity enzymes.
- 2, The pGFP vector was digested using *Xba* I and *Bam* H I.
- 3, The digested pGFP vector, the 5' (5F/5R) and 3' (3F/3R) flanking sequence, *Hyg<sup>r</sup>* cassette were mixed with ExoIII (TaKaRa Dalian Biotechnology) or Gibson Assembly Cloning Kit (NEB). \*5F and 3R contain overhangs homologous to the pGFP vector, and 5R and 3F have overhangs homologous to the *Hyg<sup>r</sup>* cassette, which allow for annealing.
- 4, The ligation mixture was transformed into *Escherichia coli* to generate gene knock-out vector.
- 5, The gene knock-out vector were introduced into *Agrobacterium tumefaciens* by electroporation.
- 6, ATMT of *V. dahliae* was performed as described previously (Xie et al. 2017 doi:10.1094/mpmi-01-17-0007-r).
- 7, The transformants were selected on PDA supplemented with cefotaxime at 500 µg/ml and hygromycin B at 50 µg/ml.



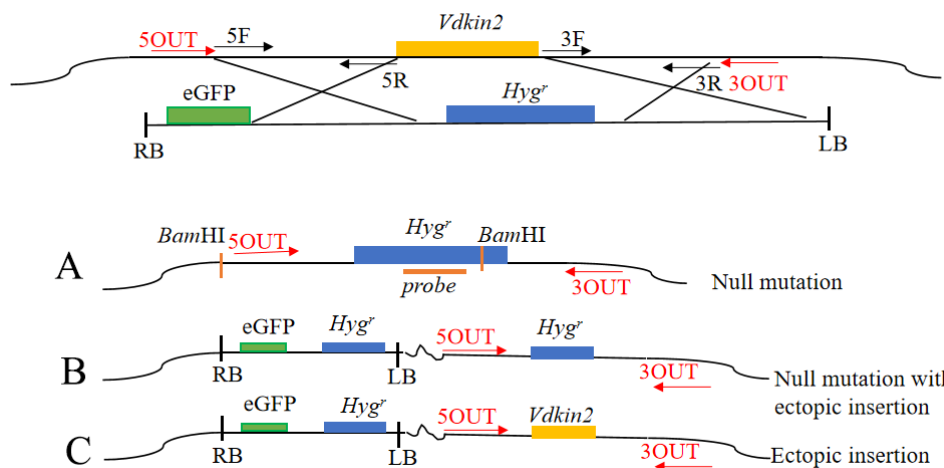

### Identification of null mutant transformants.

- 1, Transformants are screened for GFP fluorescence under a microscope. The strains without GFP fluorescence were retained for further analyses. \*Homologous recombination creates three types of transformants: **A:** null mutants, **B:** null mutants with ectopic insertions and **C:** ectopic insertion transformants. **B** and **C** have GFP fluorescence because the GFP gene was included in the T-DNA fragment (RB and LB). Null mutants (**A**) do have not GFP fluorescence because the GFP gene was eliminated in the null mutants.
- 2, Primers 5OUT and 3OUT are used for amplification gDNA from transformants. This length of null mutants should be longer than of WT or ectopic insertion transformants.
- 3, Reverse-transcription (RT)-PCR was performed to confirm the absence of *Vdkin2* mRNA in null mutants.
- 4, The gDNA were extracted with CTAB method (Kuhad, Kapoor et al. 2004 doi: 10.1007/BF02931383) and digested with *Bam*HI.
- 4, A *Hyg<sup>r</sup>* probe is used for southern blotting according to the protocol of the DIG High Prime DNA Labelling and Detection Starter Kit I (Roche, Mannheim, Germany)
